# Supplementary material for: Association of Adherence to the Mediterranean-Style Diet with Lower Frailty Index in Older Adults
Source: PubMed Central journal article supplement (PMC8065455; doi:10.3390/nu13041129), 2021-03-30
Supplement: nutrients-13-01129-s001.pdf [file nutrients-13-01129-s001.pdf]

**Table S1.** Comparison of demographic and clinical characteristics of InCHIANTI participants with and without follow up data.

|                                 | No follow up data |         | With Follow up data |         | <i>p</i> |
|---------------------------------|-------------------|---------|---------------------|---------|----------|
|                                 | Mean/ <i>n</i>    | (SD/%)  | Mean/ <i>n</i>      | (SD/%)  |          |
| <i>n</i>                        | 180               |         | 825                 |         |          |
| Age (yrs)                       | 80.0              | (8.0)   | 73.5                | (6.4)   | <0.001   |
| Sex (%Female)                   | 98                | (54.4)  | 463                 | (56.1)  | 0.743    |
| Site (%Bagno a Ripoli )         | 81                | (45.0)  | 441                 | (53.5)  | 0.048    |
| Smoking (%Smoker)               | 18                | (10.0)  | 118                 | (14.3)  | 0.159    |
| IL6 (pg/mL)                     | 3.22              | (7.12)  | 2.05                | (3.39)  | 0.033    |
| CRP (ug/mL)                     | 8.46              | (15.91) | 4.59                | (7.39)  | 0.002    |
| BMI (kg/m <sup>2</sup> )        | 27.3              | (4.4)   | 27.5                | (4.0)   | 0.647    |
| Years of Education (years)      | 4.42              | (2.87)  | 5.58                | (3.31)  | <0.001   |
| MMSE                            | 21.4              | (6.9)   | 25.4                | (3.4)   | <0.001   |
| Total energy intake (kcal/day)  | 1811.6            | (519.4) | 1942.7              | (566.1) | 0.003    |
| α-tocopherol (μmol/L)           | 28.5              | (8.9)   | 30.4                | (8.3)   | 0.009    |
| α-carotene (μmol/L)             | 0.05              | (0.04)  | 0.06                | (0.06)  | 0.035    |
| β-carotene (μmol/L)             | 0.37              | (0.23)  | 0.43                | (0.26)  | 0.004    |
| Plasma monosaturated fatty acid | 34.1              | (3.8)   | 33.0                | (3.7)   | 0.001    |
| Frailty Index                   | 0.26              | (0.19)  | 0.13                | (0.10)  | <0.001   |

**Table S2.** Association of adherence to components Mediterranean-type diet with frailty index at baseline visit.

|                 | Base Model |       |          | Fully Adjusted Model |       |          |
|-----------------|------------|-------|----------|----------------------|-------|----------|
|                 | Beta       | SE    | <i>p</i> | b                    | SE    | <i>p</i> |
| Vegetables      | -0.017     | 0.006 | 0.0086   | -0.011               | 0.006 | 0.0746   |
| Legumes         | -0.008     | 0.006 | 0.1934   | -0.003               | 0.006 | 0.5967   |
| Fruits and nuts | -0.012     | 0.006 | 0.0586   | -0.011               | 0.006 | 0.0838   |
| Cereal          | 0.009      | 0.008 | 0.2158   | 0.001                | 0.007 | 0.9001   |
| Fish            | -0.003     | 0.006 | 0.5987   | -0.006               | 0.006 | 0.2717   |
| MUFA:SFA        | -0.011     | 0.006 | 0.0672   | -0.008               | 0.006 | 0.1663   |
| Meat            | -0.005     | 0.006 | 0.4635   | -0.003               | 0.006 | 0.6430   |
| Dairy           | 0.002      | 0.006 | 0.7933   | -0.001               | 0.006 | 0.9064   |
| Alcohol         | -0.018     | 0.006 | 0.0036   | -0.014               | 0.006 | 0.0236   |

**Table S3.** Association of adherence to Mediterranean-type diet at baseline with trajectories of frailty index over 10 years.

|                                 | Base Model |       |           | Fully Adjusted Model |       |           |
|---------------------------------|------------|-------|-----------|----------------------|-------|-----------|
|                                 | Beta       | SE    | <i>p</i>  | Beta                 | SE    | <i>p</i>  |
| Adherence to MTD                |            |       |           |                      |       |           |
| Low                             |            |       | Reference |                      |       | Reference |
| Medium                          | -0.020     | 0.005 | 0.0002    | -0.013               | 0.005 | 0.0164    |
| High                            | -0.030     | 0.006 | <0.0001   | -0.030               | 0.006 | <0.0001   |
| Follow-up time                  | 0.013      | 0.001 | <0.0001   | 0.013                | 0.001 | <0.0001   |
| Baseline Age                    | 0.008      | 0.000 | <0.0001   | 0.007                | 0.000 | <0.0001   |
| Sex (women)                     | 0.026      | 0.005 | <0.0001   | 0.035                | 0.005 | <0.0001   |
| Site (Bagno a Ripoli )          | -0.012     | 0.004 | 0.0050    | -0.005               | 0.005 | 0.2672    |
| Total Energy Intake             | -0.009     | 0.003 | 0.0006    | -0.005               | 0.003 | 0.0572    |
| Smoking                         |            |       |           | 0.011                | 0.007 | 0.1020    |
| IL-6                            |            |       |           | 0.002                | 0.001 | <0.0001   |
| CRP                             |            |       |           | -0.002               | 0.001 | 0.0095    |
| BMI                             |            |       |           | 0.001                | 0.001 | 0.2871    |
| Years of Education              |            |       |           | 0.001                | 0.000 | <0.0001   |
| Plasma $\alpha$ -tocopherol     |            |       |           | -0.001               | 0.000 | 0.0031    |
| Plasma $\alpha$ -carotene       |            |       |           | 0.105                | 0.047 | 0.0239    |
| Plasma $\beta$ -carotene        |            |       |           | -0.039               | 0.010 | <0.0001   |
| Plasma monosaturated fatty acid |            |       |           | 0.002                | 0.001 | 0.0063    |

**Table S4.** Association of components of Mediterranean-type diet at baseline with trajectories of frailty index over 10 years.

|           | Main effect Diet <sup>1</sup> |       |          | Main effect Time <sup>1</sup> |       |          | Interaction (Dietxtime) |       |          |
|-----------|-------------------------------|-------|----------|-------------------------------|-------|----------|-------------------------|-------|----------|
|           | Beta                          | SE    | <i>p</i> | Beta                          | SE    | <i>p</i> | Beta                    | SE    | <i>p</i> |
| Vegetable | -0.004                        | 0.005 | 0.4360   | 0.016                         | 0.001 | 1.95E-32 | -0.006                  | 0.002 | 0.0006   |
| Legumes   | -0.006                        | 0.005 | 0.2627   | 0.014                         | 0.001 | 9.67E-25 | -0.002                  | 0.002 | 0.2743   |
| Fruit     | -0.010                        | 0.005 | 0.0514   | 0.014                         | 0.001 | 3.29E-22 | -0.001                  | 0.002 | 0.5444   |
| Cereal    | 0.002                         | 0.006 | 0.7537   | 0.013                         | 0.001 | 1.51E-23 | -0.001                  | 0.002 | 0.5951   |
| Fish      | -0.005                        | 0.005 | 0.3285   | 0.015                         | 0.001 | 1.01E-27 | -0.004                  | 0.002 | 0.0417   |
| MUFA:SFA  | -0.006                        | 0.005 | 0.2747   | 0.014                         | 0.001 | 4.68E-25 | -0.003                  | 0.002 | 0.1226   |
| Meat      | -0.008                        | 0.005 | 0.1377   | 0.012                         | 0.001 | 4.81E-18 | 0.002                   | 0.002 | 0.1867   |
| Dairy     | -0.003                        | 0.005 | 0.5376   | 0.013                         | 0.001 | 5.34E-23 | -0.001                  | 0.002 | 0.7201   |
| Alcohol   | -0.014                        | 0.005 | 0.0052   | 0.013                         | 0.001 | 1.75E-25 | 0.0002                  | 0.002 | 0.9080   |

<sup>1</sup>Results from linear mixed effects model.
